# Supplementary material for: Decree-Law 54/2018: Perspectives of Early Childhood Educators on Inclusion in Preschool Education in Portugal
Source: MDPI journal article supplement (doi:10.3390/educsci13070737), 2023-07-19
Supplement: s1 [file s1]

## QUESTIONNAIRE

### Decree-Law No. 54/2018: Perspectives of Early Childhood Educators on Inclusion in Preschool Education

Dear kindergarten teacher, This scientific research aims to analyze the perceptions of Early Childhood Educators, working in the various teaching sectors, on inclusion in Pre-School Education, resulting from the new Diploma that regulates Inclusive Education in Portugal, the Decree-Law No. 54/2018. No information will be stored that allows your identification, thus guaranteeing the anonymity and confidentiality of data, in any and all published documents, thus respecting ethical principles in investigative terms. Your participation is free and voluntary, and you may withdraw from the study at any time, without this decision having any consequences for you, and without having to give any reason. If you have any question, comment, or wish to obtain information about the results of this survey, please feel free to contact us via email: rita.bonanca@gmail.com. We would like to thank you in advance for your essential collaboration in responding to this questionnaire. Your contribution is essential for us to be able to contribute and raise the quality of pre-school education in the name of equity for all children who attend kindergartens in Portugal.

Investigation team

#### Consent:

I declare that I have been duly informed about the main goal of this study and the procedures involved, therefore, I allow the use of the data collected within the scope of this scientific investigation.

## PERSONAL DATA

#### Age:

☐ < 25 years old    ☐ 26-40 years old    ☐ 41-55 years old    ☐ > a 56 years old

#### Sex:

☐ Female    ☐ Male    |

#### Residential area:

☐ Archipelago of Azores    ☐ Archipelago of Madeira    ☐ North    ☐ Center  
☐ Lisbon Metropolitan Region    ☐ Alentejo    ☐ Algarve    |

#### Academic qualifications::

☐ Bachelor's degree    ☐ Graduate    ☐ Master's degree    ☐ Doctorate

#### Educational Sector:

☐ Public Education    ☐ Private Education    ☐ Cooperative Teaching    ☐ IPSS

#### Years in service:

☐ >5 years    ☐ 6-25 years    ☐ >26 years    |

## 1. Characterization of the Group

|     |    |
|-----|----|
| Yes | No |
|-----|----|

|                                                                                              |  |  |
|----------------------------------------------------------------------------------------------|--|--|
| 1.1 - Does your group consist of children in the same age group?                             |  |  |
| 1.2 - Are there children identified with support measures for learning and inclusion?        |  |  |
| 1.3 - Are there children marked with Specific Health Needs?                                  |  |  |
| 1.4 - Are there children taking advantage of universal measures?                             |  |  |
| 1.5 - In the group, are there children with selective and/or additional measures referenced? |  |  |

### Application, Principles and Definitions of Decree-Law No. 54/2018

|                                                                                                                                                                                                                          | 1 | 2 | 3 | 4 | 5 |
|--------------------------------------------------------------------------------------------------------------------------------------------------------------------------------------------------------------------------|---|---|---|---|---|
| 2.1 - Is the diploma fully implemented in schools?                                                                                                                                                                       |   |   |   |   |   |
| 2.2 - Do you consider that educators show difficulties/doubts in applying the diploma?                                                                                                                                   |   |   |   |   |   |
| 2.3 - Is this diploma bureaucratic?                                                                                                                                                                                      |   |   |   |   |   |
| 2.4 - Is this decree-law functional, taking into account the pedagogical practices developed in kindergarten?                                                                                                            |   |   |   |   |   |
| 2.5 - Has this diploma brought anything new to the inclusion of preschool children?                                                                                                                                      |   |   |   |   |   |
| 2.6 - Are educators clear about the guiding principles of this Decree-Law?                                                                                                                                               |   |   |   |   |   |
| 2.7 - Do educators understand the nomenclature of the diploma?                                                                                                                                                           |   |   |   |   |   |
| 2.8 - Are the educators clear about the Multilevel Model?                                                                                                                                                                |   |   |   |   |   |
| 2.9 - Do kindergarten teachers understand the principles of Universal Design for Learning?                                                                                                                               |   |   |   |   |   |
| 2.10 - Do you consider that selective and/or additional measures are not suitable for pre-school education, and that all the possibilities that a universal and preventive approach makes available should be exhausted? |   |   |   |   |   |

**Subtitle:** 1 - Completely agree; 2 - Agree; 3. I do not agree nor disagree; 4. Disagree; 5. Completely disagree.

### 3. Involvement of the Multidisciplinary Team to Support Inclusive Education (EMAEI)

|                                                                                                           | 1 | 2 | 3 | 4 | 5 |
|-----------------------------------------------------------------------------------------------------------|---|---|---|---|---|
| 3.1 - Does EMAEI favour proximity to educators?                                                           |   |   |   |   |   |
| 3.2 - Does EMAEI regularly and effectively monitor measures to support children's learning and inclusion? |   |   |   |   |   |
| 3.4 - Does EMAEI provide training for kindergarten teachers?                                              |   |   |   |   |   |
| 3.5 - Does EMAEI take into account the views of parents or legal guardians?                               |   |   |   |   |   |
| 3.6 - Does EMAEI value the opinion of other variable elements, in addition to parents?                    |   |   |   |   |   |

**Subtitle:** 1 - Completely agree; 2 - Agree; 3. I do not agree nor disagree; 4. Disagree; 5. Completely disagree.

### 4. Teacher Training

|                                                                                                                                  | 1 | 2 | 3 | 4 | 5 |
|----------------------------------------------------------------------------------------------------------------------------------|---|---|---|---|---|
| 4.1 - Do the curricula of the universities ensure the proper scientific knowledge about inclusive education?                     |   |   |   |   |   |
| 4.2 - Do educators feel the need to carry out continuous training?                                                               |   |   |   |   |   |
| 4.3 - Do you consider that the lack of training for educators is a constraint on the implementation of the diploma's principles? |   |   |   |   |   |

**Subtitle:** 1 - Completely agree; 2 - Agree; 3. I do not agree nor disagree; 4. Disagree; 5. Completely disagree.

### 5. Pedagogical Work, Collaborative Work and Mobilized Support

|                                                                                                                                        | 1 | 2 | 3 | 4 | 5 |
|----------------------------------------------------------------------------------------------------------------------------------------|---|---|---|---|---|
| 5.1 - Os educadores de infância planificam, respeitando os ritmos de aprendizagem das crianças com mais dificuldades?                  |   |   |   |   |   |
| 5.2 - Os educadores de infância realizam diferenciação pedagógica em contexto sala?                                                    |   |   |   |   |   |
| 5.3 - Considera o trabalho colaborativo entre os diferentes técnicos e especialistas um enriquecimento para os educadores de infância? |   |   |   |   |   |
| 5.4 - Considera adequados os apoios prestados às crianças com mais dificuldades?                                                       |   |   |   |   |   |

|                                                                                                                             |  |  |  |  |  |
|-----------------------------------------------------------------------------------------------------------------------------|--|--|--|--|--|
| 5.5 - Os apoios assegurados pela escola são suficientes para colmatar as dificuldades das crianças na Educação Pré-Escolar? |  |  |  |  |  |
| 5.6 - Há crianças que ficaram sem apoios, após a aprovação do Decreto-Lei n.º 54/2018?                                      |  |  |  |  |  |

**Subtitle:** 1 - *Completely agree*; 2 – *Agree*; 3. *I do not agree nor disagree*; 4. *Disagree*; 5. *Completely disagree*.

### Open Question:

Do you consider that the approval of Decree No. 54/2018, on Pre-School Education, aims to respond to the diversity of children's needs and has contributed to the involvement of all in the learning and inclusion process?
